# Supplementary material
Source: publisher figshare collection journal article supplement (https://acs.figshare.com/ndownloader/files/4648804)
Supplement: Supplementary file 1 [file 4648804]

data_a

 

_audit_creation_method            SHELXL-97

_chemical_name_systematic

;

 ?

;

_chemical_name_common             ?

_chemical_melting_point           ?

_chemical_formula_moiety          ?

_chemical_formula_sum

 'C13 H19 N4 O5 P'

_chemical_formula_weight          342.29

 

loop_

 _atom_type_symbol

 _atom_type_description

 _atom_type_scat_dispersion_real

 _atom_type_scat_dispersion_imag

 _atom_type_scat_source

 'C'  'C'   0.0033   0.0016

 'International Tables Vol C Tables 4.2.6.8 and 6.1.1.4'

 'H'  'H'   0.0000   0.0000

 'International Tables Vol C Tables 4.2.6.8 and 6.1.1.4'

 'N'  'N'   0.0061   0.0033

 'International Tables Vol C Tables 4.2.6.8 and 6.1.1.4'

 'O'  'O'   0.0106   0.0060

 'International Tables Vol C Tables 4.2.6.8 and 6.1.1.4'

 'P'  'P'   0.1023   0.0942

 'International Tables Vol C Tables 4.2.6.8 and 6.1.1.4'

 

_symmetry_cell_setting            Monoclinic

_symmetry_space_group_name_H-M    P2(1)/n

 

loop_

 _symmetry_equiv_pos_as_xyz

 'x, y, z'

 '-x+1/2, y+1/2, -z+1/2'

 '-x, -y, -z'

 'x-1/2, -y-1/2, z-1/2'

 

_cell_length_a                    12.7387(13)

_cell_length_b                    9.6430(10)

_cell_length_c                    14.6060(14)

_cell_angle_alpha                 90.00

_cell_angle_beta                  114.5560(10)

_cell_angle_gamma                 90.00

_cell_volume                      1631.9(3)

_cell_formula_units_Z             4

_cell_measurement_temperature     293(2)

_cell_measurement_reflns_used     4475

_cell_measurement_theta_min       2.61

_cell_measurement_theta_max       26.21

 

_exptl_crystal_description        ?

_exptl_crystal_colour             ?

_exptl_crystal_size_max           0.49

_exptl_crystal_size_mid           0.43

_exptl_crystal_size_min           0.30

_exptl_crystal_density_meas       ?

_exptl_crystal_density_diffrn     1.393

_exptl_crystal_density_method     'not measured'

_exptl_crystal_F_000              720

_exptl_absorpt_coefficient_mu     0.199

_exptl_absorpt_correction_type    MULTI-SCAN

_exptl_absorpt_correction_T_min   0.9083

_exptl_absorpt_correction_T_max   0.9423

_exptl_absorpt_process_details    SADABS

 

_exptl_special_details

;

 ?

;

 

_diffrn_ambient_temperature       293(2)

_diffrn_radiation_wavelength      0.71073

_diffrn_radiation_type            MoK\a

_diffrn_radiation_source          'fine-focus sealed tube'

_diffrn_radiation_monochromator   graphite

_diffrn_measurement_device_type   'CCD area detector'

_diffrn_measurement_method        'phi and omega scans'

_diffrn_detector_area_resol_mean  ?

_diffrn_standards_number          ?

_diffrn_standards_interval_count  ?

_diffrn_standards_interval_time   ?

_diffrn_standards_decay_%         ?

_diffrn_reflns_number             11809

_diffrn_reflns_av_R_equivalents   0.0193

_diffrn_reflns_av_sigmaI/netI     0.0167

_diffrn_reflns_limit_h_min        -15

_diffrn_reflns_limit_h_max        15

_diffrn_reflns_limit_k_min        -11

_diffrn_reflns_limit_k_max        11

_diffrn_reflns_limit_l_min        -17

_diffrn_reflns_limit_l_max        17

_diffrn_reflns_theta_min          2.61

_diffrn_reflns_theta_max          25.49

_reflns_number_total              3036

_reflns_number_gt                 2538

_reflns_threshold_expression      >2sigma(I)

 

_computing_data_collection        'Bruker SMART'

_computing_cell_refinement        'Bruker SMART'

_computing_data_reduction         'Bruker SAINT'

_computing_structure_solution     'SHELXS-97 (Sheldrick, 1990)'

_computing_structure_refinement   'SHELXL-97 (Sheldrick, 1997)'

_computing_molecular_graphics     'Bruker SHELXTL'

_computing_publication_material   'Bruker SHELXTL'

 

_refine_special_details

;

 Refinement of F^2^ against ALL reflections.  The weighted R-factor wR and

 goodness of fit S are based on F^2^, conventional R-factors R are based

 on F, with F set to zero for negative F^2^. The threshold expression of

 F^2^ > 2sigma(F^2^) is used only for calculating R-factors(gt) etc. and is

 not relevant to the choice of reflections for refinement.  R-factors based

 on F^2^ are statistically about twice as large as those based on F, and R-

 factors based on ALL data will be even larger.

;

 

_refine_ls_structure_factor_coef  Fsqd

_refine_ls_matrix_type            full

_refine_ls_weighting_scheme       calc

_refine_ls_weighting_details

 'calc w=1/[\s^2^(Fo^2^)+(0.0874P)^2^+1.4919P] where P=(Fo^2^+2Fc^2^)/3'

_atom_sites_solution_primary      direct

_atom_sites_solution_secondary    difmap

_atom_sites_solution_hydrogens    geom

_refine_ls_hydrogen_treatment     CONSTR

_refine_ls_extinction_method      none

_refine_ls_extinction_coef        ?

_refine_ls_number_reflns          3036

_refine_ls_number_parameters      211

_refine_ls_number_restraints      0

_refine_ls_R_factor_all           0.0667

_refine_ls_R_factor_gt            0.0572

_refine_ls_wR_factor_ref          0.1705

_refine_ls_wR_factor_gt           0.1608

_refine_ls_goodness_of_fit_ref    1.057

_refine_ls_restrained_S_all       1.057

_refine_ls_shift/su_max           0.001

_refine_ls_shift/su_mean          0.000

 

loop_

 _atom_site_label

 _atom_site_type_symbol

 _atom_site_fract_x

 _atom_site_fract_y

 _atom_site_fract_z

 _atom_site_U_iso_or_equiv

 _atom_site_adp_type

 _atom_site_occupancy

 _atom_site_symmetry_multiplicity

 _atom_site_calc_flag

 _atom_site_refinement_flags

 _atom_site_disorder_assembly

 _atom_site_disorder_group

P1 P 0.85131(6) 0.10527(7) 1.03301(5) 0.0420(2) Uani 1 1 d . . .

O1 O 0.7692(2) 0.0218(2) 0.95208(16) 0.0635(6) Uani 1 1 d . . .

O2 O 0.80159(19) 0.2085(2) 1.08771(16) 0.0573(6) Uani 1 1 d . . .

O3 O 0.9349(2) 0.0131(2) 1.12196(16) 0.0633(6) Uani 1 1 d . . .

O4 O 1.0444(3) 0.3859(2) 0.6868(2) 0.0839(9) Uani 1 1 d . . .

O5 O 1.05851(19) 0.6121(2) 0.66261(17) 0.0560(6) Uani 1 1 d . . .

N1 N 1.0496(2) 0.2373(3) 1.05858(17) 0.0487(6) Uani 1 1 d . . .

N2 N 1.08213(19) 0.4018(3) 0.94920(18) 0.0479(6) Uani 1 1 d . . .

N3 N 0.79039(19) 0.2880(3) 0.81893(17) 0.0476(6) Uani 1 1 d . . .

N4 N 0.91182(19) 0.4391(2) 0.79426(16) 0.0413(5) Uani 1 1 d . . .

C1 C 0.7083(4) 0.2999(5) 1.0287(3) 0.0838(12) Uani 1 1 d . . .

H1A H 0.7342 0.3607 0.9893 0.101 Uiso 1 1 calc R . .

H1B H 0.6448 0.2450 0.9822 0.101 Uiso 1 1 calc R . .

C2 C 0.6684(5) 0.3812(5) 1.0876(4) 0.1105(18) Uani 1 1 d . . .

H2A H 0.6536 0.3228 1.1341 0.166 Uiso 1 1 calc R . .

H2B H 0.5985 0.4275 1.0447 0.166 Uiso 1 1 calc R . .

H2C H 0.7259 0.4488 1.1241 0.166 Uiso 1 1 calc R . .

C3 C 0.9934(4) 0.0543(5) 1.2246(3) 0.0808(11) Uani 1 1 d . . .

H3A H 0.9381 0.0942 1.2469 0.097 Uiso 1 1 calc R . .

H3B H 1.0496 0.1253 1.2300 0.097 Uiso 1 1 calc R . .

C4 C 1.0508(4) -0.0594(5) 1.2887(3) 0.0919(14) Uani 1 1 d . . .

H4A H 0.9956 -0.1306 1.2827 0.138 Uiso 1 1 calc R . .

H4B H 1.0866 -0.0280 1.3572 0.138 Uiso 1 1 calc R . .

H4C H 1.1086 -0.0958 1.2693 0.138 Uiso 1 1 calc R . .

C5 C 0.9397(2) 0.2147(3) 0.99240(19) 0.0396(6) Uani 1 1 d . . .

C6 C 1.1129(2) 0.3261(4) 1.0326(2) 0.0552(8) Uani 1 1 d . . .

H6 H 1.1890 0.3366 1.0792 0.066 Uiso 1 1 calc R . .

C7 C 0.9738(2) 0.3766(3) 0.88576(19) 0.0387(6) Uani 1 1 d . . .

C8 C 0.8976(2) 0.2844(3) 0.90075(18) 0.0383(6) Uani 1 1 d . . .

C9 C 0.8039(2) 0.3804(3) 0.7590(2) 0.0478(7) Uani 1 1 d . . .

H9 H 0.7451 0.4044 0.6974 0.057 Uiso 1 1 calc R . .

C10 C 0.9507(2) 0.5514(3) 0.7501(2) 0.0439(6) Uani 1 1 d . . .

H10A H 0.9959 0.6158 0.8028 0.053 Uiso 1 1 calc R . .

H10B H 0.8840 0.6010 0.7028 0.053 Uiso 1 1 calc R . .

C11 C 1.0224(2) 0.5030(3) 0.6966(2) 0.0450(6) Uani 1 1 d . . .

C12 C 1.1365(4) 0.5857(4) 0.6142(3) 0.0713(10) Uani 1 1 d . . .

H12A H 1.0967 0.5346 0.5521 0.086 Uiso 1 1 calc R . .

H12B H 1.2021 0.5312 0.6582 0.086 Uiso 1 1 calc R . .

C13 C 1.1759(5) 0.7211(5) 0.5930(5) 0.1123(19) Uani 1 1 d . . .

H13A H 1.1102 0.7763 0.5526 0.169 Uiso 1 1 calc R . .

H13B H 1.2235 0.7068 0.5573 0.169 Uiso 1 1 calc R . .

H13C H 1.2196 0.7682 0.6552 0.169 Uiso 1 1 calc R . .

 

loop_

 _atom_site_aniso_label

 _atom_site_aniso_U_11

 _atom_site_aniso_U_22

 _atom_site_aniso_U_33

 _atom_site_aniso_U_23

 _atom_site_aniso_U_13

 _atom_site_aniso_U_12

P1 0.0498(4) 0.0411(4) 0.0347(4) 0.0005(3) 0.0172(3) 0.0008(3)

O1 0.0766(15) 0.0589(13) 0.0499(12) -0.0069(10) 0.0212(11) -0.0189(11)

O2 0.0639(13) 0.0598(13) 0.0545(12) 0.0024(10) 0.0307(11) 0.0083(10)

O3 0.0777(15) 0.0590(13) 0.0488(12) 0.0076(10) 0.0217(11) 0.0076(11)

O4 0.124(2) 0.0457(14) 0.126(2) -0.0018(14) 0.096(2) 0.0018(14)

O5 0.0674(14) 0.0484(12) 0.0693(14) 0.0002(10) 0.0455(12) -0.0040(10)

N1 0.0417(12) 0.0626(15) 0.0360(12) 0.0031(11) 0.0102(10) 0.0022(11)

N2 0.0351(12) 0.0608(15) 0.0441(13) -0.0006(11) 0.0127(10) -0.0035(10)

N3 0.0374(12) 0.0628(15) 0.0365(12) 0.0065(11) 0.0095(10) -0.0050(11)

N4 0.0398(11) 0.0477(13) 0.0370(11) 0.0036(10) 0.0164(9) 0.0003(10)

C1 0.067(2) 0.101(3) 0.078(3) 0.013(2) 0.025(2) 0.033(2)

C2 0.120(4) 0.096(3) 0.129(4) -0.002(3) 0.065(4) 0.037(3)

C3 0.086(3) 0.080(3) 0.057(2) 0.0072(19) 0.0106(19) 0.007(2)

C4 0.116(4) 0.081(3) 0.058(2) 0.017(2) 0.016(2) -0.004(3)

C5 0.0409(13) 0.0446(14) 0.0323(12) -0.0011(10) 0.0144(11) 0.0042(11)

C6 0.0362(14) 0.076(2) 0.0433(16) 0.0009(15) 0.0069(12) -0.0003(14)

C7 0.0371(13) 0.0448(14) 0.0342(13) -0.0013(11) 0.0148(11) 0.0031(11)

C8 0.0363(13) 0.0454(14) 0.0315(12) -0.0008(11) 0.0125(10) 0.0018(11)

C9 0.0378(14) 0.0639(18) 0.0352(14) 0.0071(13) 0.0087(11) -0.0009(13)

C10 0.0469(15) 0.0432(15) 0.0447(14) 0.0048(12) 0.0221(12) 0.0017(12)

C11 0.0509(15) 0.0428(15) 0.0447(15) 0.0001(12) 0.0234(13) -0.0020(12)

C12 0.080(2) 0.073(2) 0.087(3) -0.0047(19) 0.060(2) -0.0045(19)

C13 0.130(4) 0.087(3) 0.175(5) 0.012(3) 0.119(4) -0.011(3)

 

_geom_special_details

;

 All esds (except the esd in the dihedral angle between two l.s. planes)

 are estimated using the full covariance matrix.  The cell esds are taken

 into account individually in the estimation of esds in distances, angles

 and torsion angles; correlations between esds in cell parameters are only

 used when they are defined by crystal symmetry.  An approximate (isotropic)

 treatment of cell esds is used for estimating esds involving l.s. planes.

;

 

loop_

 _geom_bond_atom_site_label_1

 _geom_bond_atom_site_label_2

 _geom_bond_distance

 _geom_bond_site_symmetry_2

 _geom_bond_publ_flag

P1 O1 1.453(2) . ?

P1 O2 1.566(2) . ?

P1 O3 1.569(2) . ?

P1 C5 1.814(3) . ?

O2 C1 1.442(4) . ?

O3 C3 1.425(4) . ?

O4 C11 1.186(4) . ?

O5 C11 1.325(3) . ?

O5 C12 1.462(4) . ?

N1 C6 1.336(4) . ?

N1 C5 1.347(3) . ?

N2 C7 1.327(3) . ?

N2 C6 1.331(4) . ?

N3 C9 1.310(4) . ?

N3 C8 1.392(3) . ?

N4 C9 1.374(4) . ?

N4 C7 1.377(3) . ?

N4 C10 1.449(3) . ?

C1 C2 1.405(6) . ?

C1 H1A 0.9700 . ?

C1 H1B 0.9700 . ?

C2 H2A 0.9600 . ?

C2 H2B 0.9600 . ?

C2 H2C 0.9600 . ?

C3 C4 1.430(5) . ?

C3 H3A 0.9700 . ?

C3 H3B 0.9700 . ?

C4 H4A 0.9600 . ?

C4 H4B 0.9600 . ?

C4 H4C 0.9600 . ?

C5 C8 1.391(4) . ?

C6 H6 0.9300 . ?

C7 C8 1.399(4) . ?

C9 H9 0.9300 . ?

C10 C11 1.502(4) . ?

C10 H10A 0.9700 . ?

C10 H10B 0.9700 . ?

C12 C13 1.477(5) . ?

C12 H12A 0.9700 . ?

C12 H12B 0.9700 . ?

C13 H13A 0.9600 . ?

C13 H13B 0.9600 . ?

C13 H13C 0.9600 . ?

 

loop_

 _geom_angle_atom_site_label_1

 _geom_angle_atom_site_label_2

 _geom_angle_atom_site_label_3

 _geom_angle

 _geom_angle_site_symmetry_1

 _geom_angle_site_symmetry_3

 _geom_angle_publ_flag

O1 P1 O2 117.41(14) . . ?

O1 P1 O3 111.79(14) . . ?

O2 P1 O3 102.52(12) . . ?

O1 P1 C5 113.01(13) . . ?

O2 P1 C5 103.59(12) . . ?

O3 P1 C5 107.50(13) . . ?

C1 O2 P1 119.4(2) . . ?

C3 O3 P1 126.2(2) . . ?

C11 O5 C12 117.0(2) . . ?

C6 N1 C5 118.0(2) . . ?

C7 N2 C6 111.4(2) . . ?

C9 N3 C8 103.7(2) . . ?

C9 N4 C7 105.3(2) . . ?

C9 N4 C10 128.0(2) . . ?

C7 N4 C10 126.5(2) . . ?

C2 C1 O2 113.2(4) . . ?

C2 C1 H1A 108.9 . . ?

O2 C1 H1A 108.9 . . ?

C2 C1 H1B 108.9 . . ?

O2 C1 H1B 108.9 . . ?

H1A C1 H1B 107.8 . . ?

C1 C2 H2A 109.5 . . ?

C1 C2 H2B 109.5 . . ?

H2A C2 H2B 109.5 . . ?

C1 C2 H2C 109.5 . . ?

H2A C2 H2C 109.5 . . ?

H2B C2 H2C 109.5 . . ?

O3 C3 C4 112.2(4) . . ?

O3 C3 H3A 109.2 . . ?

C4 C3 H3A 109.2 . . ?

O3 C3 H3B 109.2 . . ?

C4 C3 H3B 109.2 . . ?

H3A C3 H3B 107.9 . . ?

C3 C4 H4A 109.5 . . ?

C3 C4 H4B 109.5 . . ?

H4A C4 H4B 109.5 . . ?

C3 C4 H4C 109.5 . . ?

H4A C4 H4C 109.5 . . ?

H4B C4 H4C 109.5 . . ?

N1 C5 C8 118.9(2) . . ?

N1 C5 P1 117.4(2) . . ?

C8 C5 P1 123.5(2) . . ?

N2 C6 N1 128.9(3) . . ?

N2 C6 H6 115.5 . . ?

N1 C6 H6 115.5 . . ?

N2 C7 N4 127.5(2) . . ?

N2 C7 C8 126.5(2) . . ?

N4 C7 C8 106.0(2) . . ?

C5 C8 N3 133.4(2) . . ?

C5 C8 C7 116.3(2) . . ?

N3 C8 C7 110.3(2) . . ?

N3 C9 N4 114.8(2) . . ?

N3 C9 H9 122.6 . . ?

N4 C9 H9 122.6 . . ?

N4 C10 C11 113.2(2) . . ?

N4 C10 H10A 108.9 . . ?

C11 C10 H10A 108.9 . . ?

N4 C10 H10B 108.9 . . ?

C11 C10 H10B 108.9 . . ?

H10A C10 H10B 107.8 . . ?

O4 C11 O5 125.2(3) . . ?

O4 C11 C10 125.7(3) . . ?

O5 C11 C10 109.2(2) . . ?

O5 C12 C13 107.8(3) . . ?

O5 C12 H12A 110.1 . . ?

C13 C12 H12A 110.1 . . ?

O5 C12 H12B 110.1 . . ?

C13 C12 H12B 110.1 . . ?

H12A C12 H12B 108.5 . . ?

C12 C13 H13A 109.5 . . ?

C12 C13 H13B 109.5 . . ?

H13A C13 H13B 109.5 . . ?

C12 C13 H13C 109.5 . . ?

H13A C13 H13C 109.5 . . ?

H13B C13 H13C 109.5 . . ?

 

loop_

 _geom_torsion_atom_site_label_1

 _geom_torsion_atom_site_label_2

 _geom_torsion_atom_site_label_3

 _geom_torsion_atom_site_label_4

 _geom_torsion

 _geom_torsion_site_symmetry_1

 _geom_torsion_site_symmetry_2

 _geom_torsion_site_symmetry_3

 _geom_torsion_site_symmetry_4

 _geom_torsion_publ_flag

O1 P1 O2 C1 -48.8(3) . . . . ?

O3 P1 O2 C1 -171.7(3) . . . . ?

C5 P1 O2 C1 76.5(3) . . . . ?

O1 P1 O3 C3 -154.4(3) . . . . ?

O2 P1 O3 C3 -27.8(3) . . . . ?

C5 P1 O3 C3 81.0(3) . . . . ?

P1 O2 C1 C2 176.7(3) . . . . ?

P1 O3 C3 C4 172.3(3) . . . . ?

C6 N1 C5 C8 -0.1(4) . . . . ?

C6 N1 C5 P1 -174.9(2) . . . . ?

O1 P1 C5 N1 -145.7(2) . . . . ?

O2 P1 C5 N1 86.2(2) . . . . ?

O3 P1 C5 N1 -21.9(2) . . . . ?

O1 P1 C5 C8 39.7(3) . . . . ?

O2 P1 C5 C8 -88.4(2) . . . . ?

O3 P1 C5 C8 163.5(2) . . . . ?

C7 N2 C6 N1 -2.3(5) . . . . ?

C5 N1 C6 N2 2.2(5) . . . . ?

C6 N2 C7 N4 177.4(3) . . . . ?

C6 N2 C7 C8 0.4(4) . . . . ?

C9 N4 C7 N2 -178.5(3) . . . . ?

C10 N4 C7 N2 -3.3(4) . . . . ?

C9 N4 C7 C8 -1.0(3) . . . . ?

C10 N4 C7 C8 174.2(2) . . . . ?

N1 C5 C8 N3 -177.8(3) . . . . ?

P1 C5 C8 N3 -3.3(4) . . . . ?

N1 C5 C8 C7 -1.4(4) . . . . ?

P1 C5 C8 C7 173.08(19) . . . . ?

C9 N3 C8 C5 176.0(3) . . . . ?

C9 N3 C8 C7 -0.6(3) . . . . ?

N2 C7 C8 C5 1.3(4) . . . . ?

N4 C7 C8 C5 -176.2(2) . . . . ?

N2 C7 C8 N3 178.5(3) . . . . ?

N4 C7 C8 N3 1.0(3) . . . . ?

C8 N3 C9 N4 0.0(3) . . . . ?

C7 N4 C9 N3 0.7(3) . . . . ?

C10 N4 C9 N3 -174.4(3) . . . . ?

C9 N4 C10 C11 -103.1(3) . . . . ?

C7 N4 C10 C11 82.8(3) . . . . ?

C12 O5 C11 O4 -3.5(5) . . . . ?

C12 O5 C11 C10 175.9(3) . . . . ?

N4 C10 C11 O4 2.2(5) . . . . ?

N4 C10 C11 O5 -177.2(2) . . . . ?

C11 O5 C12 C13 -173.6(4) . . . . ?

 

_diffrn_measured_fraction_theta_max    0.999

_diffrn_reflns_theta_full              25.49

_diffrn_measured_fraction_theta_full   0.999

_refine_diff_density_max    0.800

_refine_diff_density_min   -0.331

_refine_diff_density_rms    0.058
